# Supplementary material for: AS-tDR-007872: A Novel tRNA-Derived Small RNA Acts an Important Role in Non-Small-Cell Lung Cancer
Source: Hindawi journal article supplement (doi:10.1155/2022/3475955), 2022-06-16
Supplement: f5 [file 3475955.f5.pdf]

Human | UAAGCCA

144 conserved targets, with a total of 149 conserved sites. (Table sorted by number and type of sites)

| Target gene | Gene name                                                      | Conserved sites |      |         |         | Links to sites in UTRs |
|-------------|----------------------------------------------------------------|-----------------|------|---------|---------|------------------------|
|             |                                                                | total           | 8mer | 7mer-m8 | 7mer-1A |                        |
| EIF5        | eukaryotic translation initiation factor 5                     | 2               | 2    | 0       | 0       | Sites in UTR           |
| HNRNPR      | heterogeneous nuclear ribonucleoprotein R                      | 2               | 2    | 0       | 0       | Sites in UTR           |
| SH3TC2      | SH3 domain and tetratricopeptide repeats 2                     | 2               | 2    | 0       | 0       | Sites in UTR           |
| KIAA1553    | KIAA1553                                                       | 2               | 1    | 1       | 0       | Sites in UTR           |
| ARID1A      | AT rich interactive domain 1A (SWI-like)                       | 1               | 1    | 0       | 0       | Sites in UTR           |
| ARID1B      | AT rich interactive domain 1B (SWI1-like)                      | 1               | 1    | 0       | 0       | Sites in UTR           |
| C22orf24    | chromosome 22 open reading frame 24                            | 1               | 1    | 0       | 0       | Sites in UTR           |
| C4orf19     | chromosome 4 open reading frame 19                             | 1               | 1    | 0       | 0       | Sites in UTR           |
| C5orf25     | chromosome 5 open reading frame 25                             | 1               | 1    | 0       | 0       | Sites in UTR           |
| C5orf43     | chromosome 5 open reading frame 43                             | 1               | 1    | 0       | 0       | Sites in UTR           |
| C7orf42     | chromosome 7 open reading frame 42                             | 1               | 1    | 0       | 0       | Sites in UTR           |
| C9orf97     | chromosome 9 open reading frame 97                             | 1               | 1    | 0       | 0       | Sites in UTR           |
| CAMKK2      | calcium/calmodulin-dependent protein kinase kinase 2, beta     | 1               | 1    | 0       | 0       | Sites in UTR           |
| CANX        | calnexin                                                       | 1               | 1    | 0       | 0       | Sites in UTR           |
| CCDC55      | coiled-coil domain containing 55                               | 1               | 1    | 0       | 0       | Sites in UTR           |
| CIITA       | class II, major histocompatibility complex, transactivator     | 1               | 1    | 0       | 0       | Sites in UTR           |
| CLCN5       | chloride channel 5 (nephrolithiasis 2, X-linked, Dent disease) | 1               | 1    | 0       | 0       | Sites in UTR           |
| CLTB        | clathrin, light chain (Lcb)                                    | 1               | 1    | 0       | 0       | Sites in UTR           |
| CSNK1D      | casein kinase 1, delta                                         | 1               | 1    | 0       | 0       | Sites in UTR           |
| CTNNBIP1    | catenin, beta interacting protein 1                            | 1               | 1    | 0       | 0       | Sites in UTR           |
| CXorf1      | chromosome X open reading frame 1                              | 1               | 1    | 0       | 0       | Sites in UTR           |
| ERLIN2      | ER lipid raft associated 2                                     | 1               | 1    | 0       | 0       | Sites in UTR           |
| EXOC5       | exocyst complex component 5                                    | 1               | 1    | 0       | 0       | Sites in UTR           |
| ELI43582    | ELI43582 protein                                               | 1               | 1    | 0       | 0       | Sites in UTR           |

**B**

Show all objects

- hsa05200 Pathways in cancer - Homo sapiens (human) (11) [Cancer network viewer]
- hsa04151 PI3K-Akt signaling pathway - Homo sapiens (human) (7)
- hsa04014 Ras signaling pathway - Homo sapiens (human) (7)
- hsa04010 MAPK signaling pathway - Homo sapiens (human) (6)
- hsa05164 Influenza A - Homo sapiens (human) (6)
- hsa04015 Rap1 signaling pathway - Homo sapiens (human) (5)
- hsa05166 Human T-cell leukemia virus 1 infection - Homo sapiens (human) (5)
- hsa04068 FoxO signaling pathway - Homo sapiens (human) (5)
- hsa01100 Metabolic pathways - Homo sapiens (human) (5)
- hsa05224 Breast cancer - Homo sapiens (human) (5)
- hsa04080 Neuroactive ligand-receptor interaction - Homo sapiens (human) (5)
- hsa05152 Tuberculosis - Homo sapiens (human) (5)
- hsa05165 Human papillomavirus infection - Homo sapiens (human) (4)
- hsa05145 Toxoplasmosis - Homo sapiens (human) (4)
- hsa04932 Non-alcoholic fatty liver disease (NAFLD) - Homo sapiens (human) (4)
- hsa05205 Proteoglycans in cancer - Homo sapiens (human) (4)
- hsa05225 Hepatocellular carcinoma - Homo sapiens (human) (4)
- hsa05168 Herpes simplex infection - Homo sapiens (human) (4)
- hsa04714 Thermogenesis - Homo sapiens (human) (4)
- hsa05161 Hepatitis B - Homo sapiens (human) (4)
- hsa04310 Wnt signaling pathway - Homo sapiens (human) (4)
- hsa03013 RNA transport - Homo sapiens (human) (4)

Show all objects

- hsa05200 Pathways in cancer - Homo sapiens (human) (11) [Cancer network viewer]
- up:043521 hsa:10018 BCL2L11; BCL2 like 11
- up:P78504 hsa:182 JAG1; jagged 1
- up:P11362 hsa:2260 FGFR1; fibroblast growth factor receptor 1
- up:P38484 hsa:3460 IFNGR2; interferon gamma receptor 2
- up:P05019 hsa:3479 IGF1; insulin like growth factor 1
- up:O14920 hsa:3551 IKBKB; inhibitor of nuclear factor kappa B
- up:P23458 hsa:3716 JAK1; Janus kinase 1
- up:P10721 hsa:3819 KIT; KIT proto-oncogene receptor tyrosine
- up:Q13043 hsa:6789 STK4; serine/threonine kinase 4
- up:P41221 hsa:7474 WNT5A; Wnt family member 5A
- up:PODP24 hsa:808 CALM3; calmodulin 3
