# Supplementary material for: AS-tDR-007872: A Novel tRNA-Derived Small RNA Acts an Important Role in Non-Small-Cell Lung Cancer
Source: Hindawi journal article supplement (doi:10.1155/2022/3475955), 2022-06-16
Supplement: f6 [file 3475955.f6.pdf]

## Comparison of BCL2L11 Across 10 Analyses

Over-expression

| Median Rank | p-Value | Gene    |
|-------------|---------|---------|
| 2188.5      | 0.008   | BCL2L11 |

### Legend

1. Lung Adenocarcinoma vs. Normal  
*Bhattacharjee Lung, Proc Natl Acad Sci U S A, 2001*
2. Breast Adenocarcinoma Type: Medullary Breast Carcinoma  
*Curtis Breast, Nature, 2012*
3. Breast Adenocarcinoma Type: Mucinous Breast Carcinoma  
*Curtis Breast, Nature, 2012*
4. Breast Carcinoma vs. Normal  
*Curtis Breast, Nature, 2012*
5. Lung Adenocarcinoma vs. Normal  
*Hou Lung, PLoS One, 2010*
6. Lung Adenocarcinoma vs. Normal  
*Landi Lung, PLoS ONE, 2008*
7. Lung Adenocarcinoma vs. Normal  
*Okayama Lung, Cancer Res, 2012*
8. Lung Adenocarcinoma vs. Normal  
*Selamat Lung, Genome Res, 2012*
9. Lung Adenocarcinoma vs. Normal  
*Stearman Lung, Am J Pathol, 2005*
10. Lung Adenocarcinoma vs. Normal  
*Su Lung, BMC Genomics, 2007*

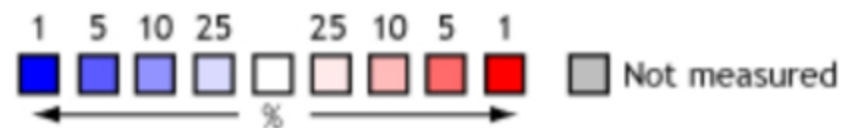

The rank for a gene is the median rank for that gene across each of the analyses.  
The p-Value for a gene is its p-Value for the median-ranked analysis.

## Comparison of CALM3 Across 11 Analyses

Over-expression

| Median Rank | p-Value | Gene  |
|-------------|---------|-------|
| 7438.0      | 0.997   | CALM3 |

### Legend

1. Lung Adenocarcinoma vs. Normal  
*Beer Lung, Nat Med, 2002*
2. Lung Adenocarcinoma vs. Normal  
*Bhattacharjee Lung, Proc Natl Acad Sci U S A, 2001*
3. Breast Adenocarcinoma Type: Medullary Breast Carcinoma  
*Curtis Breast, Nature, 2012*
4. Breast Adenocarcinoma Type: Mucinous Breast Carcinoma  
*Curtis Breast, Nature, 2012*
5. Breast Carcinoma vs. Normal  
*Curtis Breast, Nature, 2012*
6. Lung Adenocarcinoma vs. Normal  
*Hou Lung, PLoS One, 2010*
7. Lung Adenocarcinoma vs. Normal  
*Landi Lung, PLoS ONE, 2008*
8. Lung Adenocarcinoma vs. Normal  
*Okayama Lung, Cancer Res, 2012*
9. Lung Adenocarcinoma vs. Normal  
*Selamat Lung, Genome Res, 2012*
10. Lung Adenocarcinoma vs. Normal  
*Stearman Lung, Am J Pathol, 2005*
11. Lung Adenocarcinoma vs. Normal  
*Su Lung, BMC Genomics, 2007*

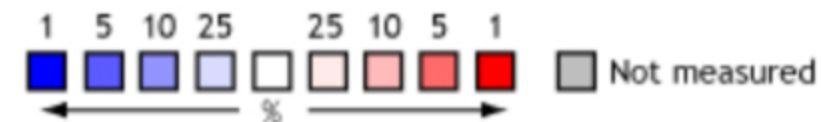

The rank for a gene is the median rank for that gene across each of the analyses.  
The p-Value for a gene is its p-Value for the median-ranked analysis.
