# Supplementary figures and images for: AS-tDR-007872: A Novel tRNA-Derived Small RNA Acts an Important Role in Non-Small-Cell Lung Cancer
Source: PubMed Central journal article supplement (PMC9226974; doi:10.1155/2022/3475955), 2022-06-16

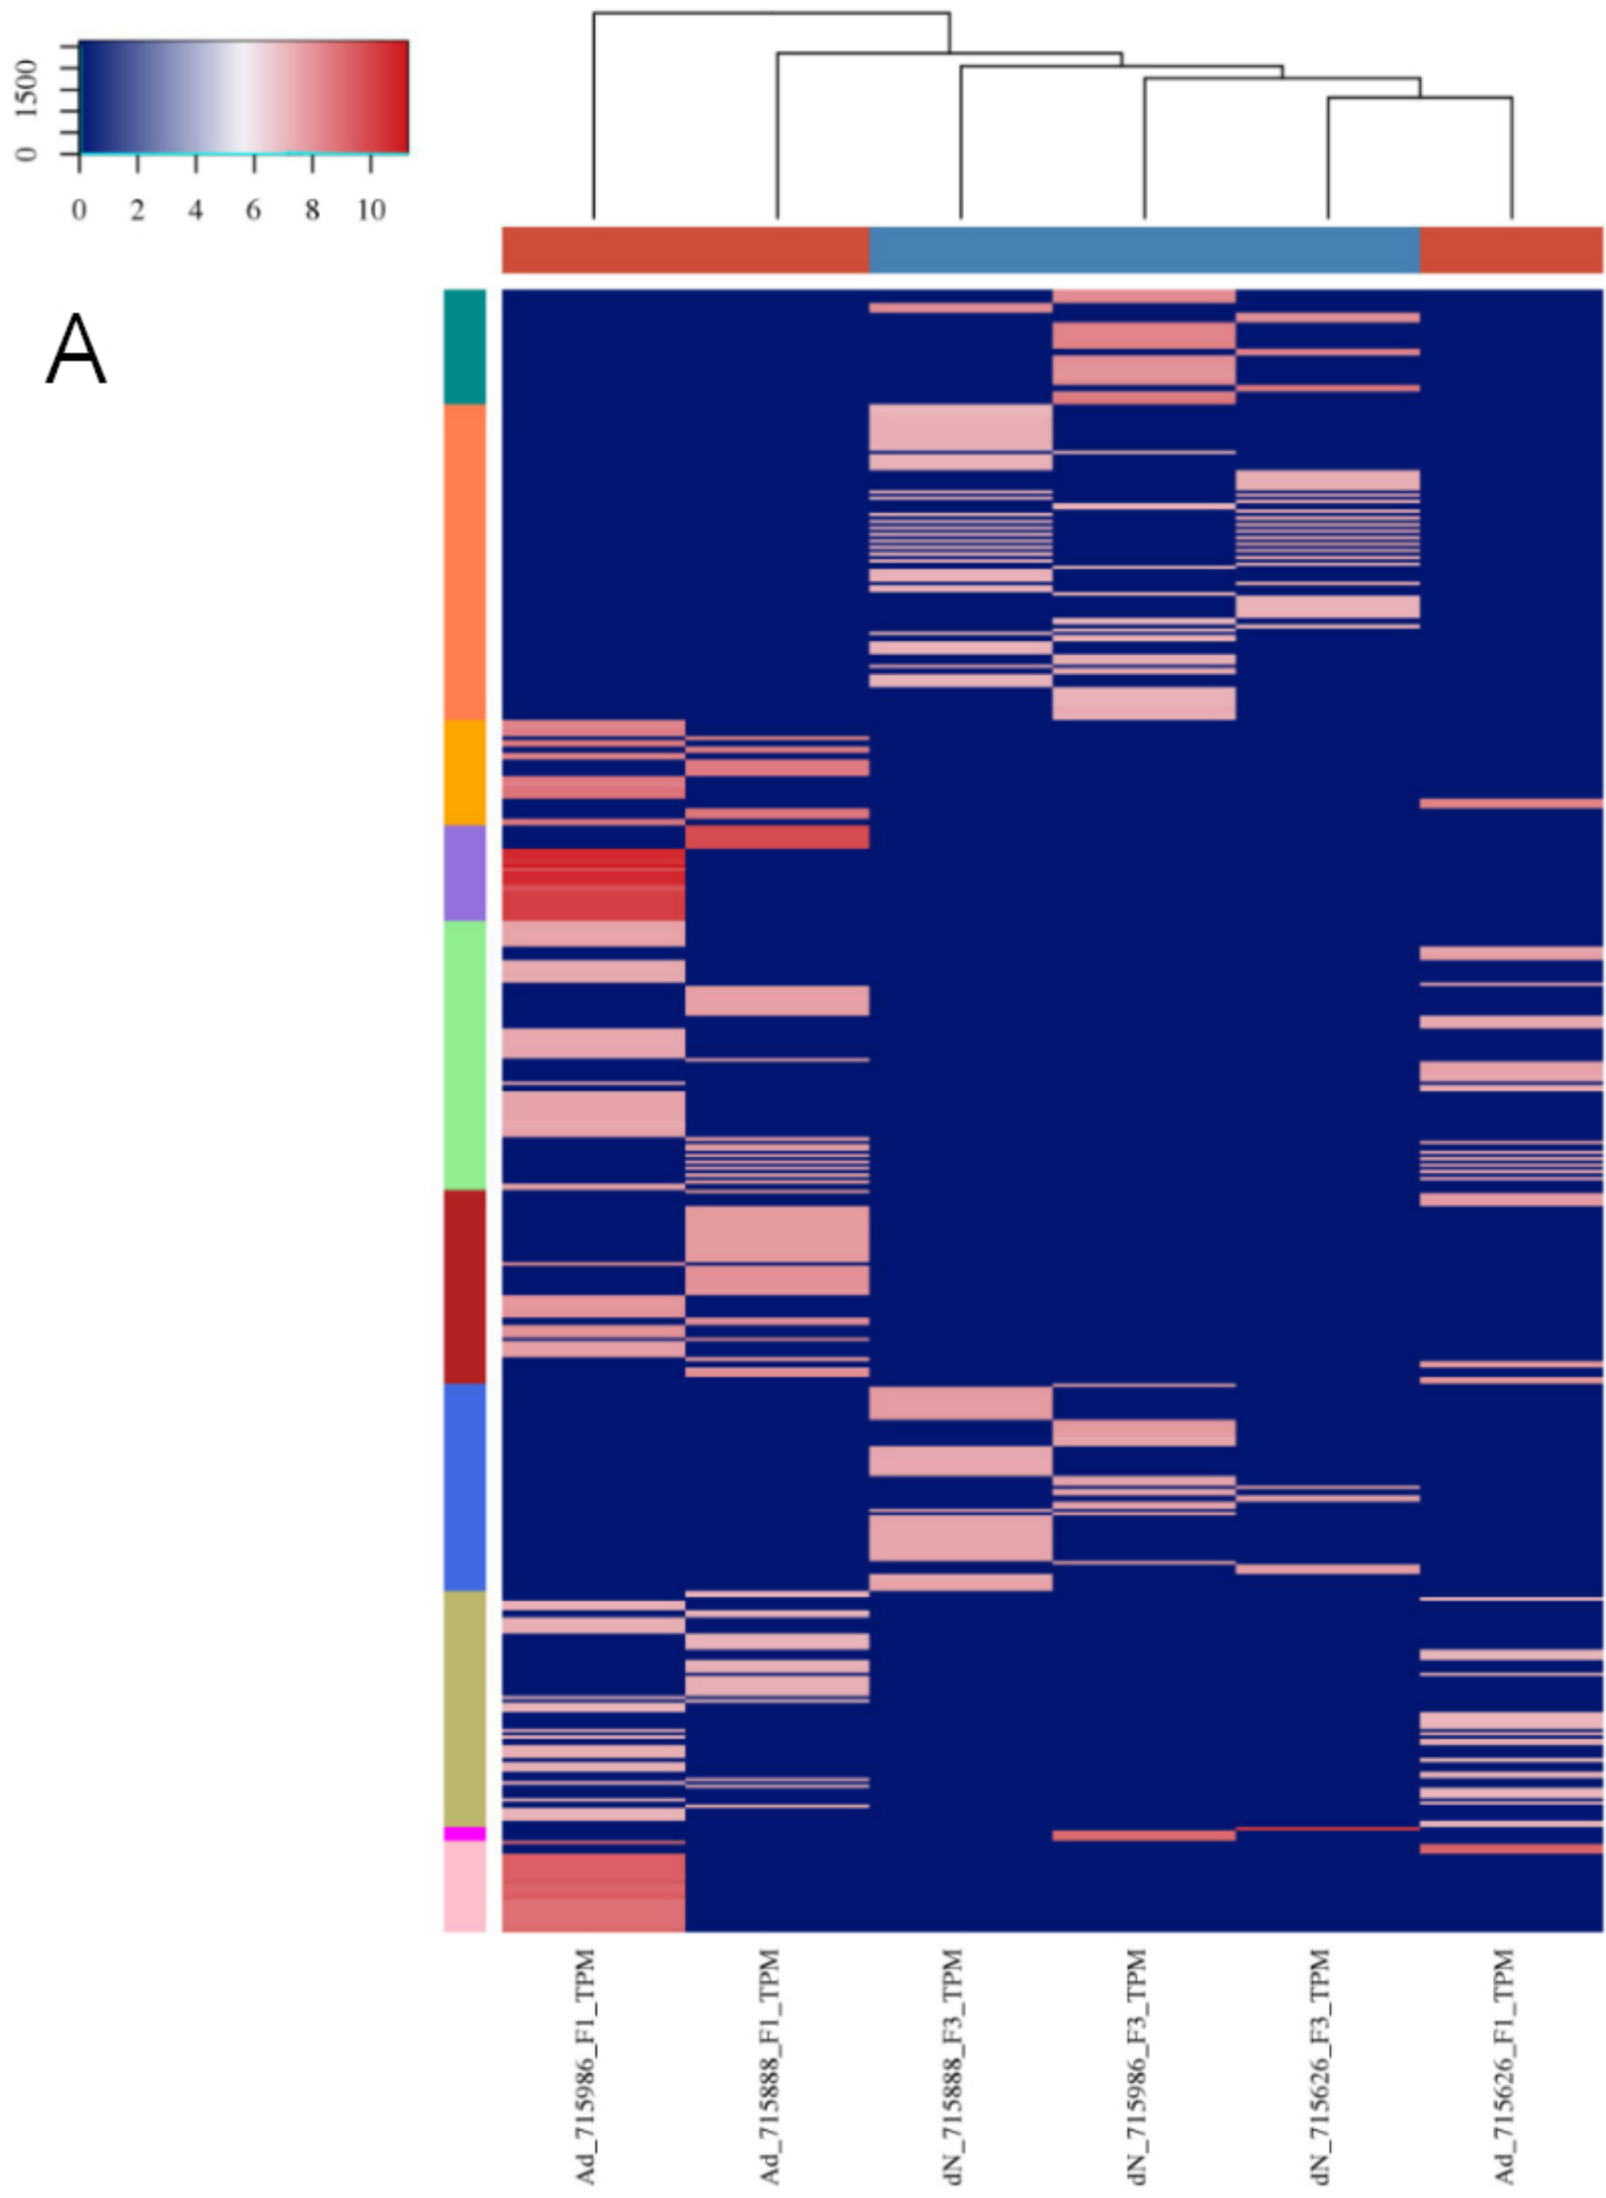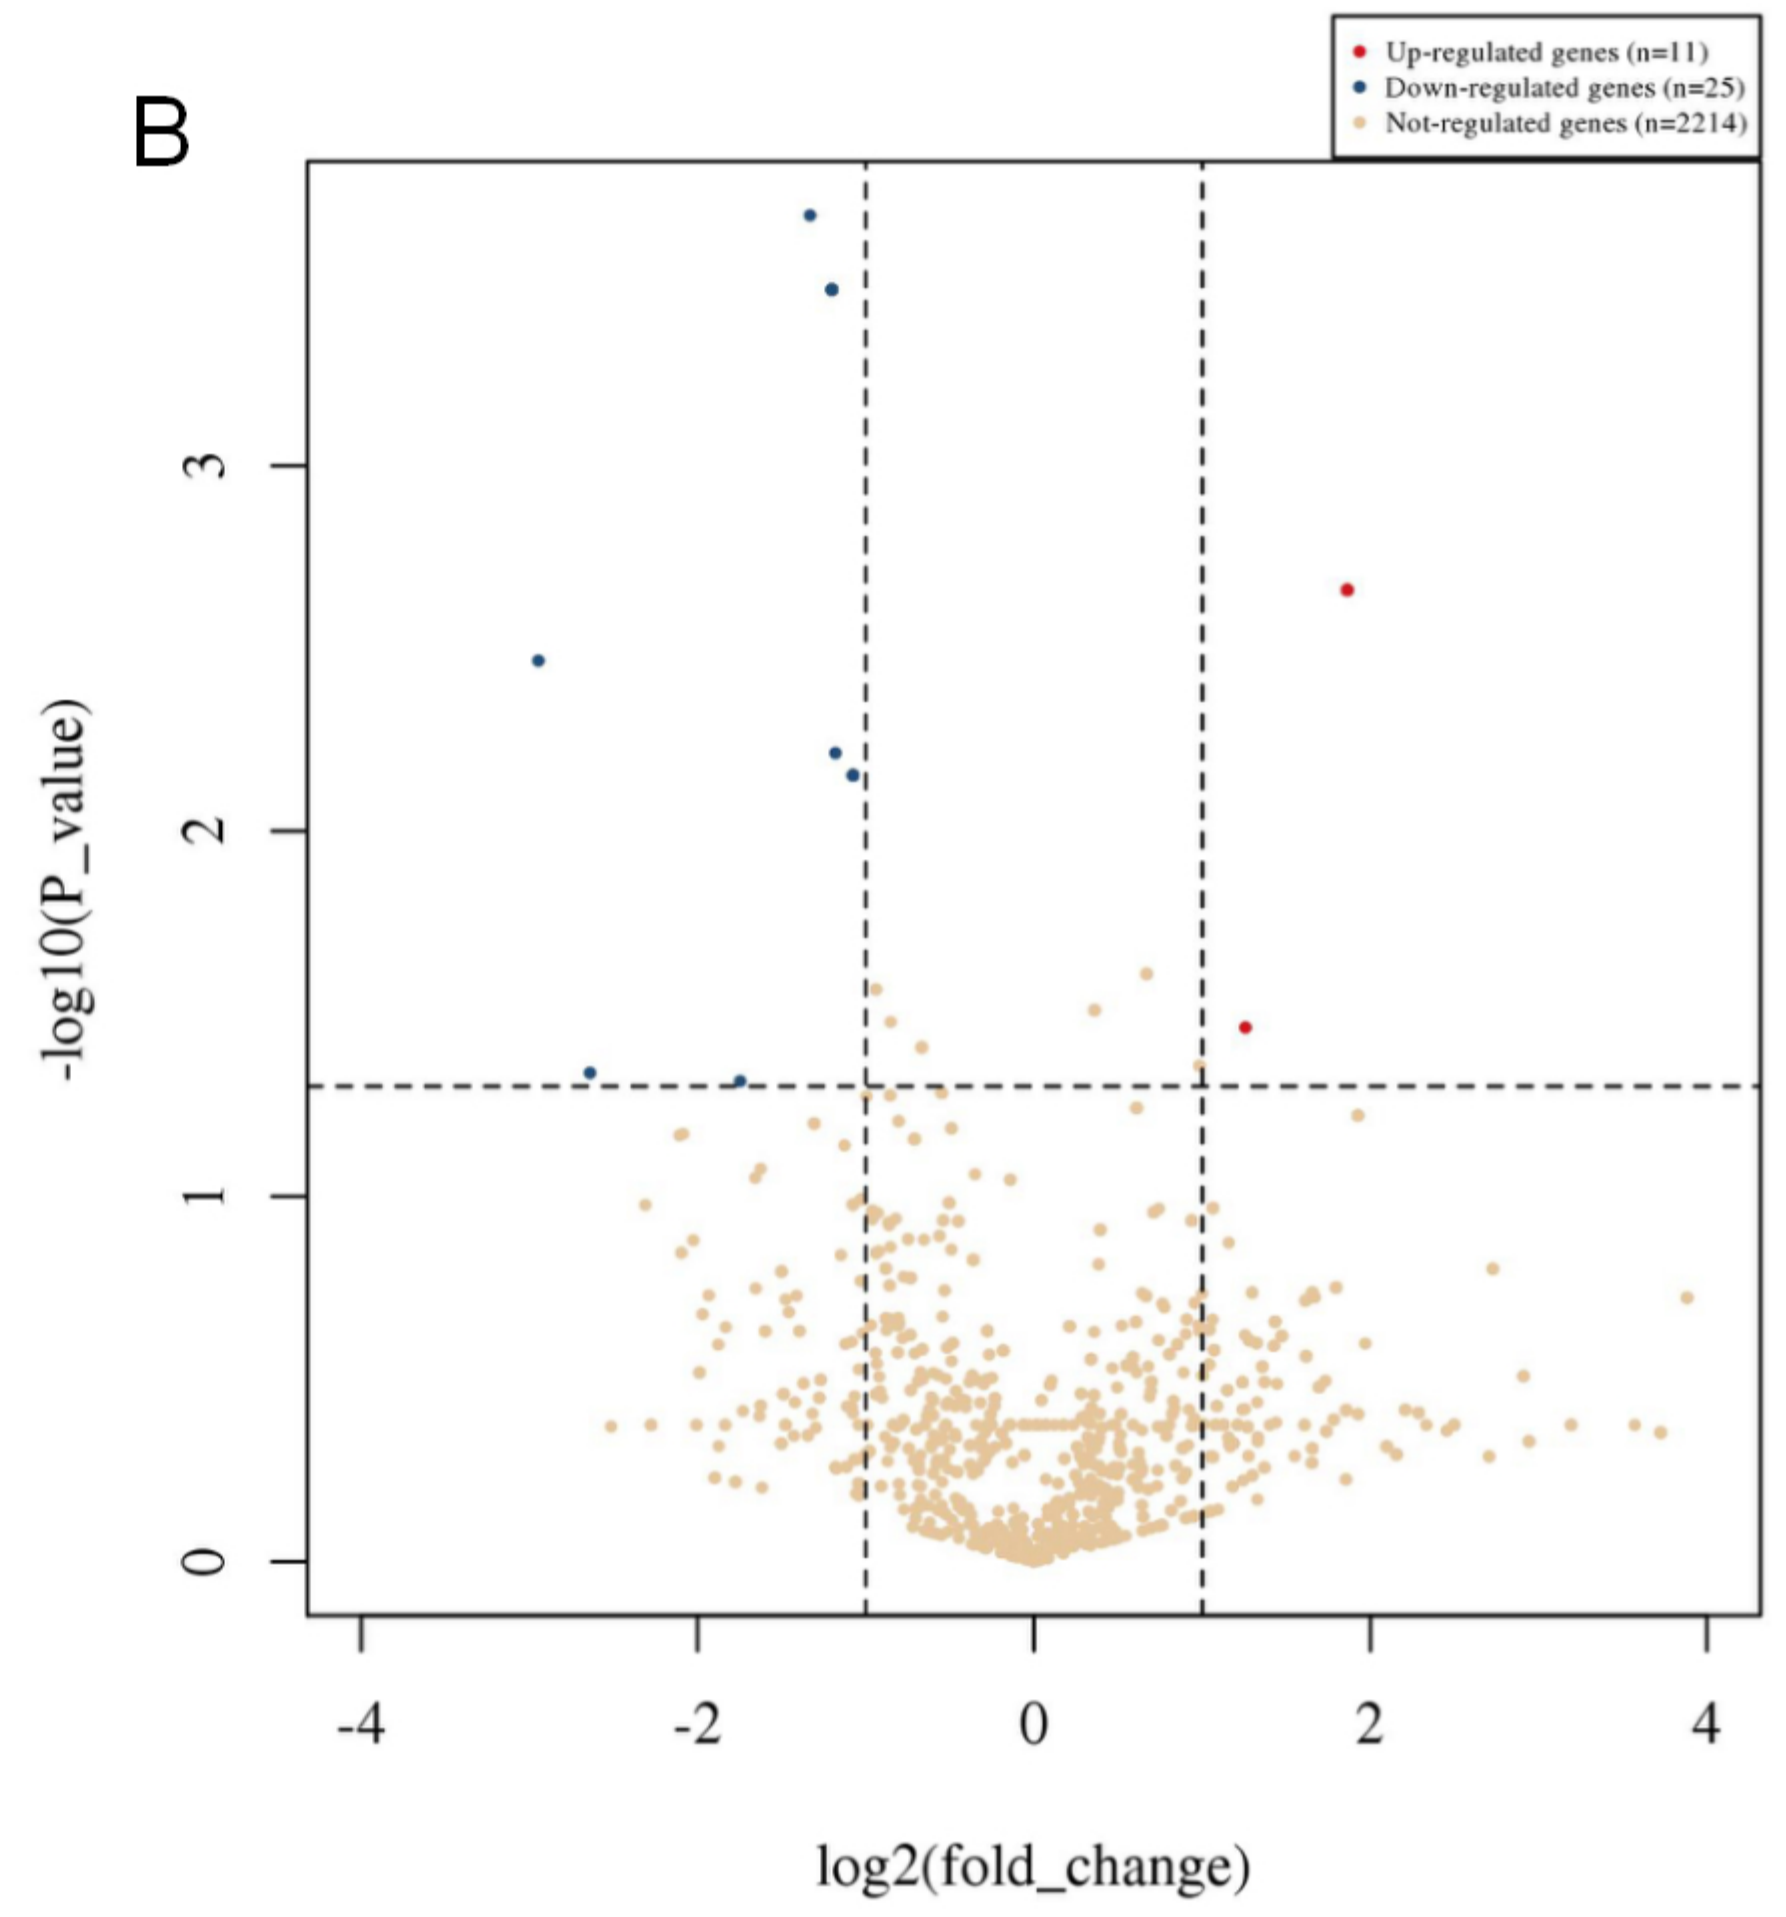

Supplement: 3475955.f1.pdf [file 3475955.f1.pdf]

# normal tissues

# cancer tissues

- tRF-5
- tRF-3
- tRF-1
- itRF
- tiRNA-5
- tiRNA-3

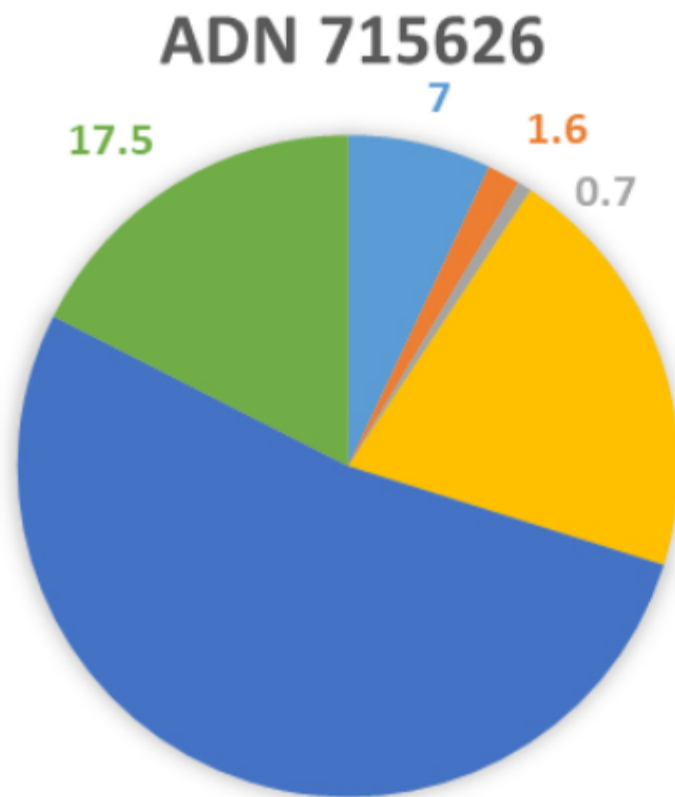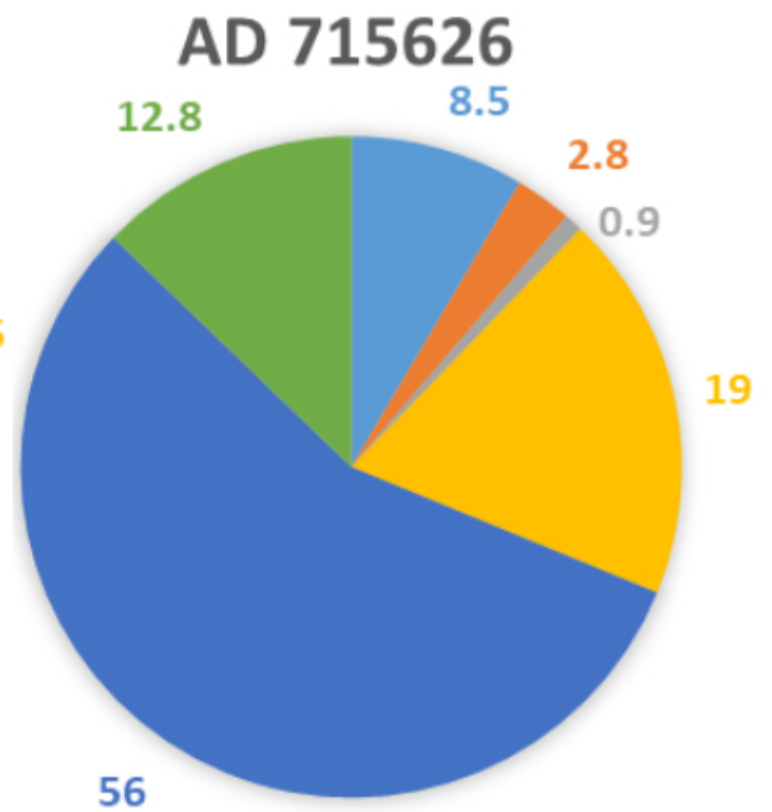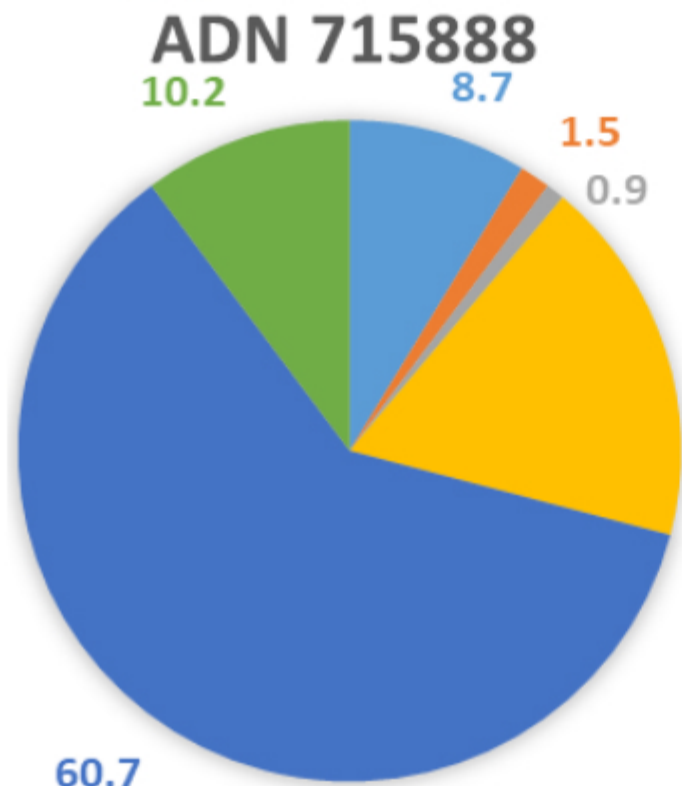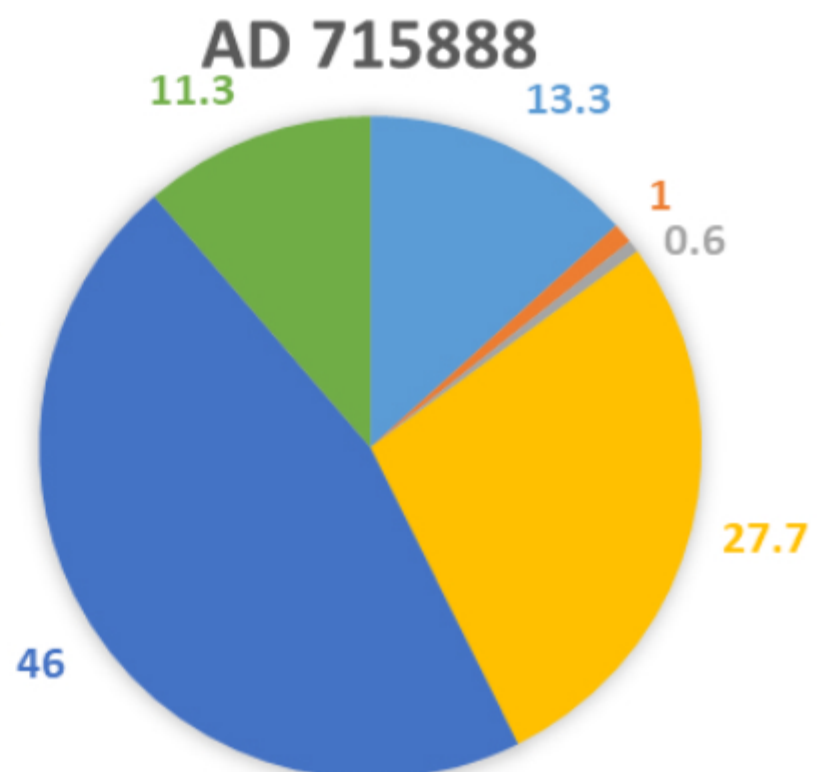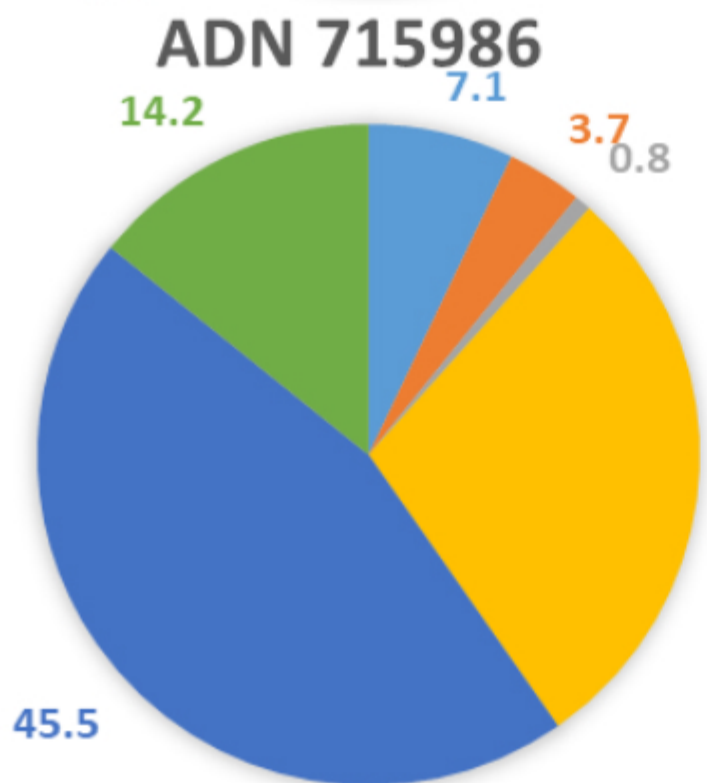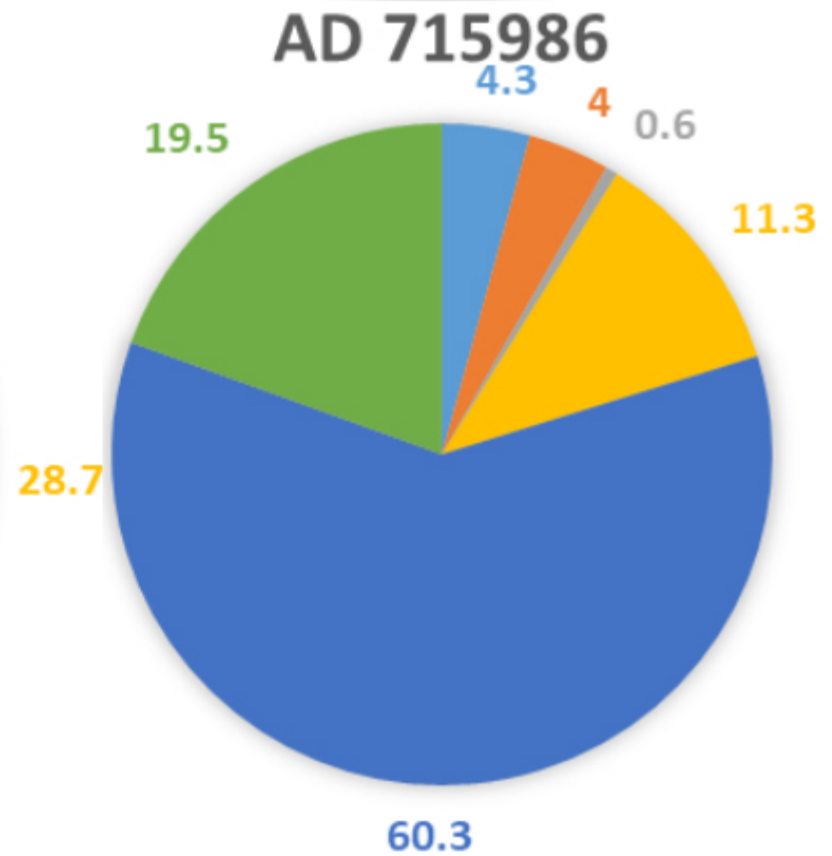

Supplement: 3475955.f2.pdf [file 3475955.f2.pdf]

A549

SPCA1

control

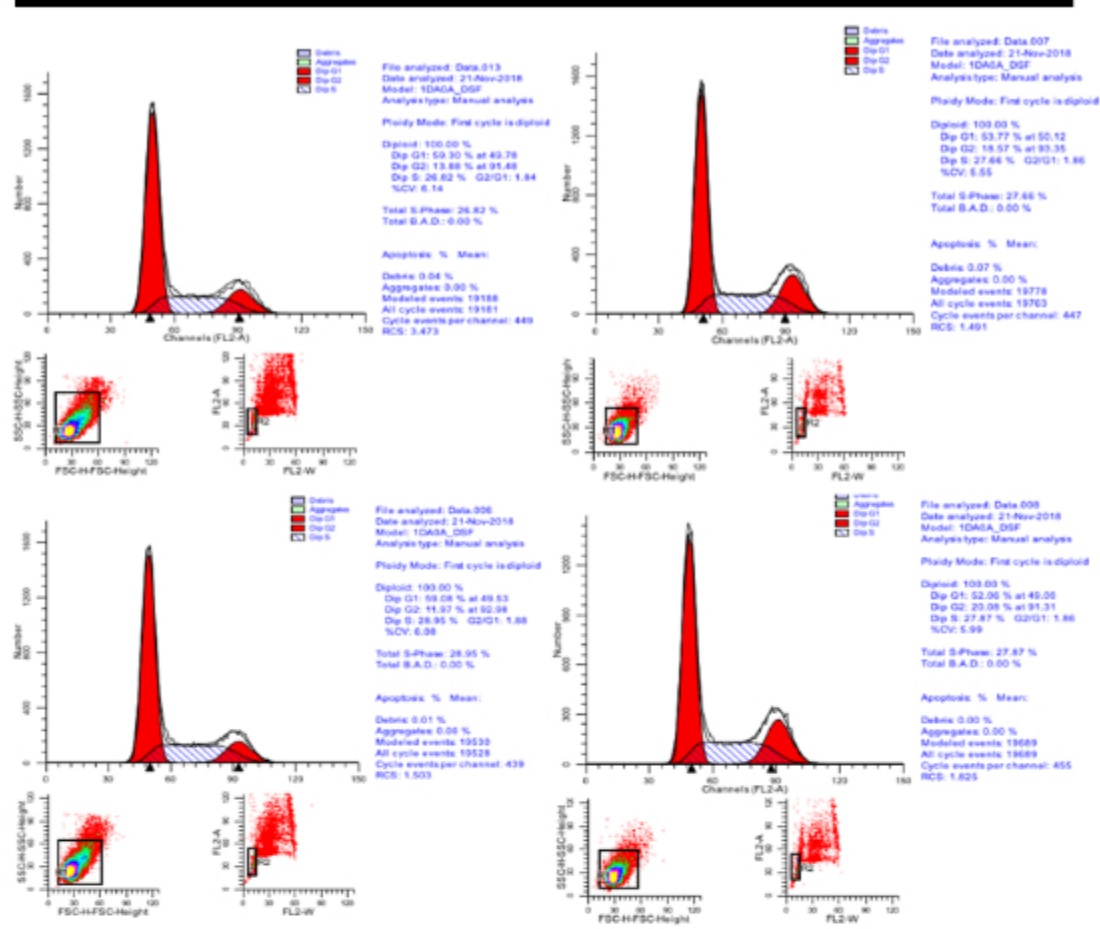

7872 mimics

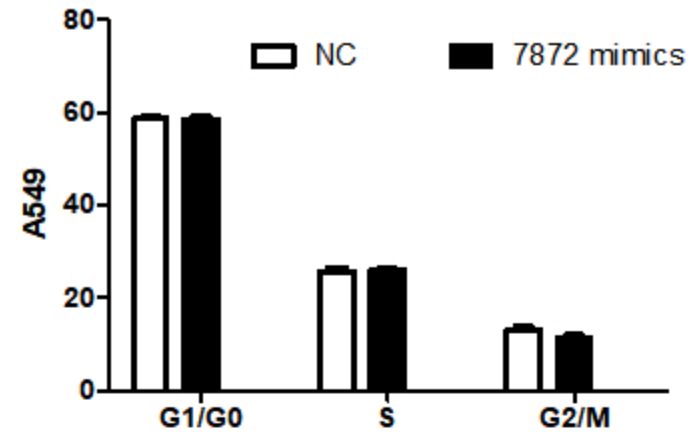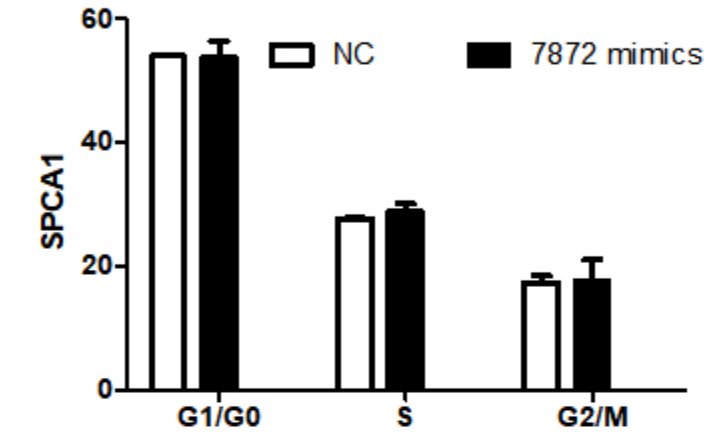

H1299

H1975

control

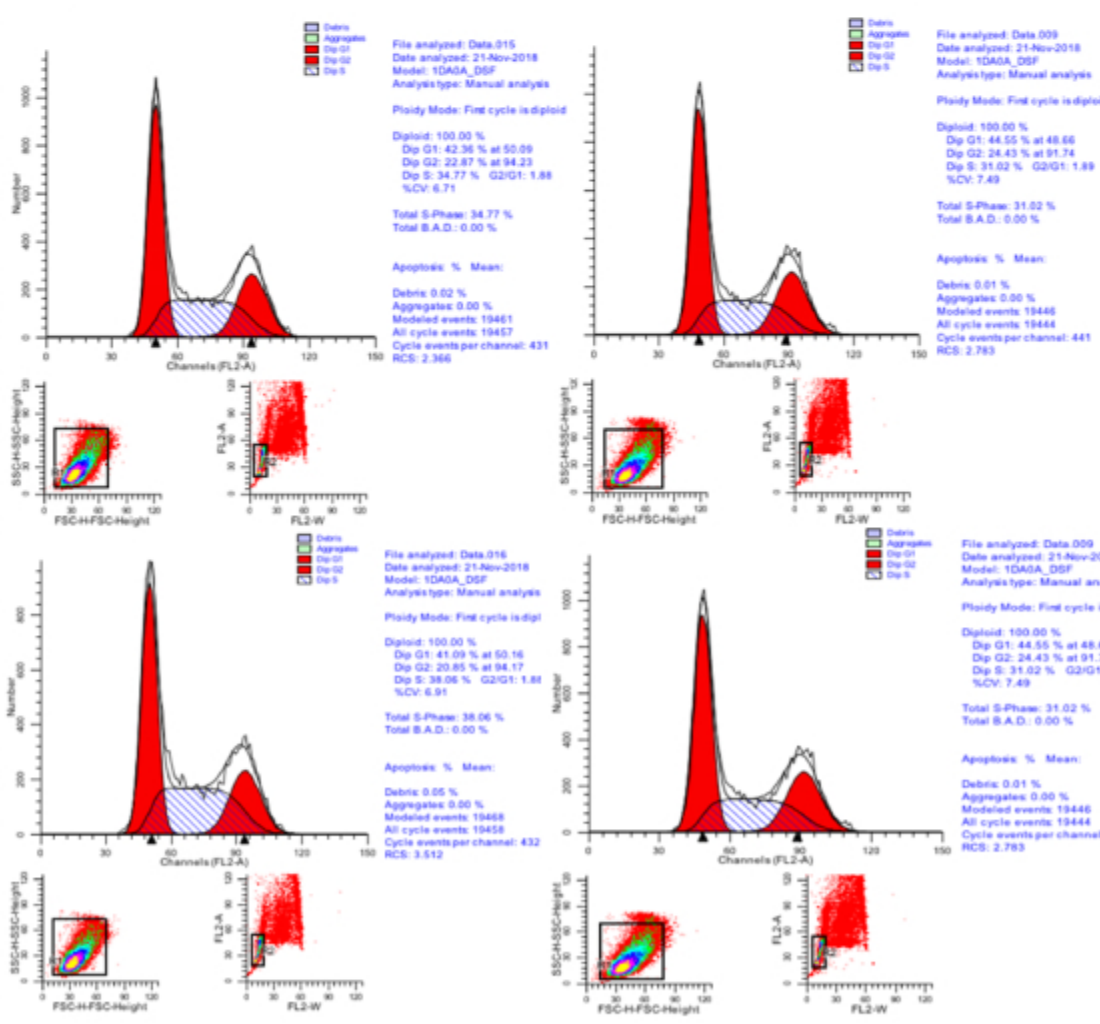

7872 Inhibitor

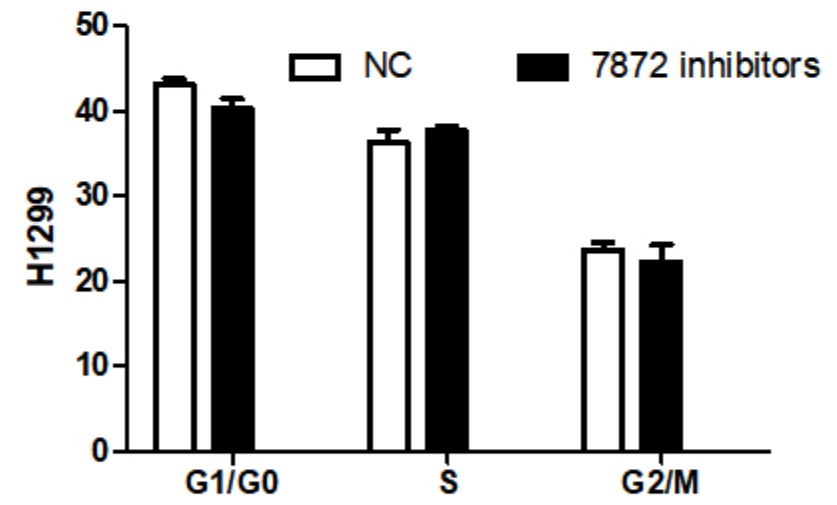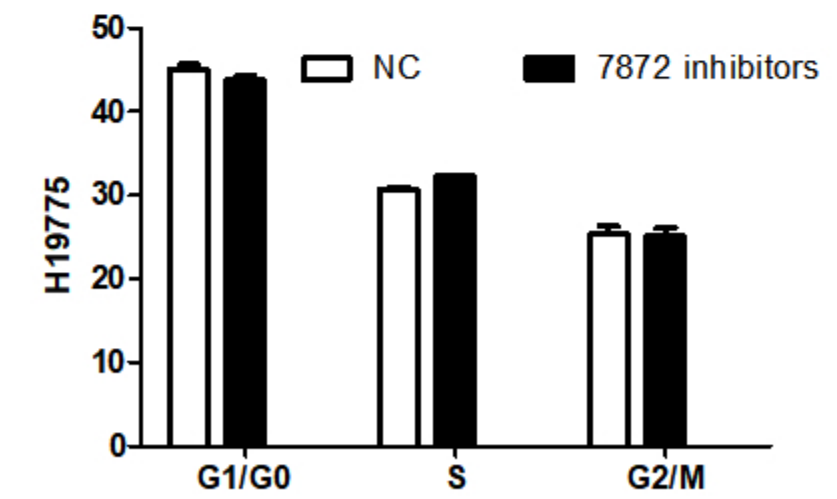

Supplement: 3475955.f4.pdf [file 3475955.f4.pdf]
