# Supplementary figures and images for: AS-tDR-007872: A Novel tRNA-Derived Small RNA Acts an Important Role in Non-Small-Cell Lung Cancer
Source: Hindawi journal article supplement (doi:10.1155/2022/3475955), 2022-06-16

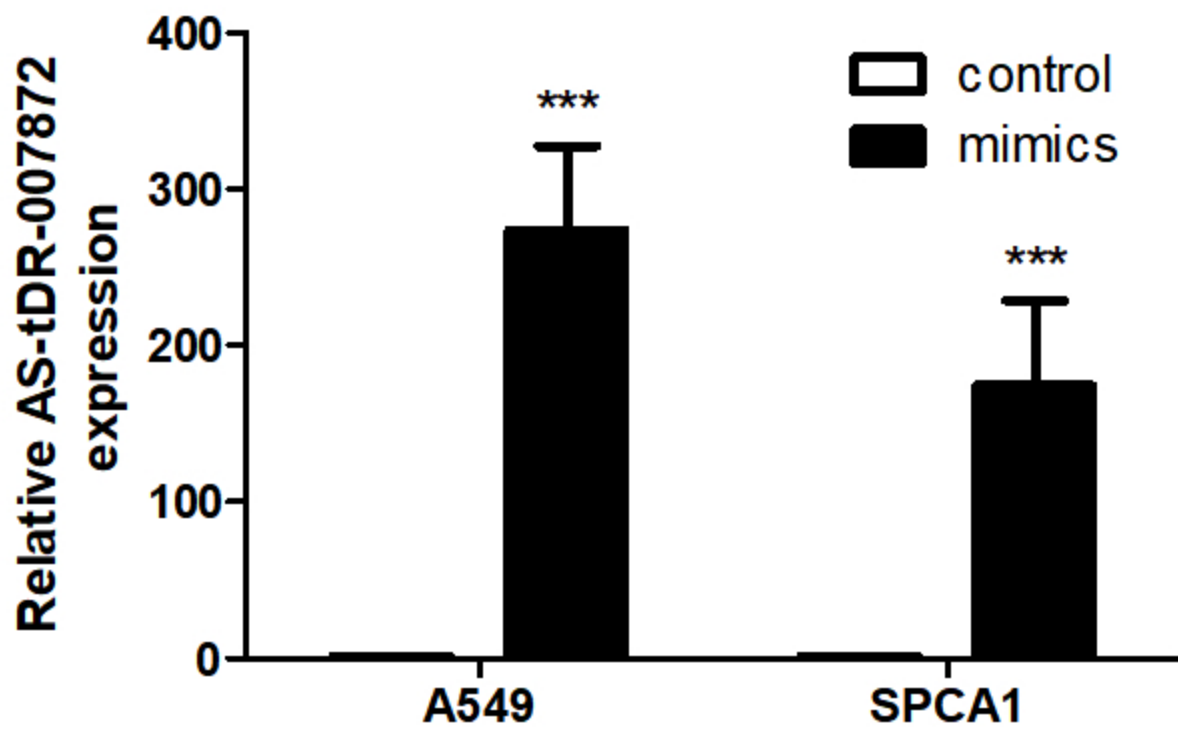

Supplement: f3 [file 3475955.f3.pdf]
